# Supplementary material for: The effect of UV-B on Arabidopsis leaves depends on light conditions after treatment
Source: PubMed Central journal article supplement (PMC4660668; doi:10.1186/s12870-015-0667-2), 2015-11-25
Supplement: 12870_2015_667_MOESM3_ESM.pdf [file 12870_2015_667_MOESM3_ESM.pdf]

Supplemental Table 3. Analysis of statistical relevance in changes of photosynthetic pigments level (a: chlorophyll a, b: chlorophyll b, c: chlorophyll a/chlorophyll b ratio, d: violaxanthin, e: neoxanthin, f: lutein, g:  $\beta$ -carotene) as well as in yield of Photosystem II (h).

a

Chl a

|      | 0CL | 1CL | 2CL | 3CL | 4CL | 0CD | 1CD | 2CD | 3CD | 4CD | 0UVD | 1UVD | 2UVD | 3UVD | 4UVD | 0UVL | 1UVL | 2UVL | 3UVL | 4UVL |   |
|------|-----|-----|-----|-----|-----|-----|-----|-----|-----|-----|------|------|------|------|------|------|------|------|------|------|---|
| 0CL  |     |     |     |     |     |     |     |     |     | 2   |      |      |      |      |      |      |      |      |      |      | 3 |
| 1CL  |     |     |     |     |     |     |     |     | 1   | 3   |      |      |      | 1    | 2    |      |      |      |      | 2    | 3 |
| 2CL  |     |     |     |     |     |     |     |     |     | 2   |      |      |      |      | 1    |      |      |      |      | 1    | 3 |
| 3CL  |     |     |     |     |     |     |     |     |     | 3   |      |      |      |      | 2    |      |      |      |      | 2    | 3 |
| 4CL  |     |     |     |     |     |     |     |     | 2   | 3   |      |      |      | 2    | 3    |      |      |      |      | 3    | 3 |
| 0CD  |     |     |     |     |     |     |     |     |     | 2   |      |      |      |      | 1    |      |      |      |      | 1    | 3 |
| 1CD  |     |     |     |     |     |     |     |     |     | 2   |      |      |      |      |      |      |      |      |      |      | 2 |
| 2CD  |     |     |     |     |     |     |     |     |     | 1   |      |      |      |      |      |      |      |      |      |      | 2 |
| 3CD  |     |     | 1   |     |     | 2   |     |     |     |     |      |      |      |      |      |      | 1    |      |      |      |   |
| 4CD  | 2   | 3   | 2   | 3   | 3   | 2   | 2   | 1   |     |     |      | 1    |      |      |      | 3    | 3    |      |      |      |   |
| 0UVD |     |     |     |     |     |     |     |     |     |     |      |      |      |      |      |      |      |      |      |      |   |
| 1UVD |     |     |     |     |     |     |     |     |     | 1   |      |      |      |      |      |      |      |      |      |      | 2 |
| 2UVD |     |     |     |     |     |     |     |     |     |     |      |      |      |      |      |      |      |      |      |      | 2 |
| 3UVD |     |     | 1   |     |     | 2   |     |     |     |     |      |      |      |      |      |      |      |      |      |      |   |
| 4UVD |     |     | 2   | 1   | 2   | 3   | 1   |     |     |     |      |      |      |      |      |      | 2    | 1    |      |      |   |
| 0UVL |     |     |     |     |     |     |     |     |     | 1   | 3    |      |      |      | 2    |      |      |      |      | 2    | 3 |
| 1UVL |     |     |     |     |     |     |     |     |     | 3   |      |      |      |      | 1    |      |      |      |      |      | 2 |
| 2UVL |     |     |     |     |     |     |     |     |     |     |      |      |      |      |      |      |      |      |      |      |   |
| 3UVL |     |     | 2   | 1   | 2   | 3   | 1   |     |     |     |      |      |      |      |      |      | 2    | 2    |      |      |   |
| 4UVL | 3   | 3   | 3   | 3   | 3   | 3   | 3   | 2   | 2   |     |      |      | 2    | 2    |      | 3    | 3    |      |      |      |   |

One-way ANOVA with Tukey post-test

empty cell- not significant

1:  $P < 0.05$ 2:  $P < 0.01$ 3:  $P < 0.001$

b

Chl b

|      | 0CL | 1CL | 2CL | 3CL | 4CL | 0CD | 1CD | 2CD | 3CD | 4CD | 0UVD | 1UVD | 2UVD | 3UVD | 4UVD | 0UVL | 1UVL | 2UVL | 3UVL | 4UVL |   |
|------|-----|-----|-----|-----|-----|-----|-----|-----|-----|-----|------|------|------|------|------|------|------|------|------|------|---|
| 0CL  |     |     |     |     |     |     |     |     |     | 2   |      |      |      |      |      |      |      |      |      |      | 2 |
| 1CL  |     |     |     |     |     |     |     |     | 1   | 3   |      |      |      |      | 2    |      |      |      |      | 1    | 3 |
| 2CL  |     |     |     |     |     |     |     |     |     | 3   |      |      |      |      |      |      |      |      |      |      | 2 |
| 3CL  |     |     |     |     |     |     |     |     |     | 2   |      |      |      |      |      |      |      |      |      |      | 2 |
| 4CL  |     |     |     |     |     |     |     |     | 2   | 3   |      |      |      |      | 2    |      |      |      |      | 2    | 3 |
| 0CD  |     |     |     |     |     |     |     |     |     | 2   |      |      |      |      |      |      |      |      |      |      | 2 |
| 1CD  |     |     |     |     |     |     |     |     |     | 2   |      |      |      |      |      |      |      |      |      |      | 2 |
| 2CD  |     |     |     |     |     |     |     |     |     | 1   |      |      |      |      |      |      |      |      |      |      |   |
| 3CD  |     | 1   |     |     | 2   |     |     |     |     |     |      |      |      |      |      |      | 1    | 1    |      |      |   |
| 4CD  | 2   | 3   | 3   | 2   | 3   | 2   | 2   | 1   |     |     |      | 2    |      |      |      |      | 3    | 3    |      |      |   |
| 0UVD |     |     |     |     |     |     |     |     |     |     |      |      |      |      |      |      |      |      |      |      | 2 |
| 1UVD |     |     |     |     |     |     |     |     |     | 2   |      |      |      |      |      |      |      |      |      |      | 2 |
| 2UVD |     |     |     |     |     |     |     |     |     |     |      |      |      |      |      |      |      |      |      |      |   |
| 3UVD |     |     |     |     |     |     |     |     |     |     |      |      |      |      |      |      |      |      |      |      |   |
| 4UVD |     | 2   |     |     | 2   |     |     |     |     |     |      |      |      |      |      |      | 1    | 1    |      |      |   |
| 0UVL |     |     |     |     |     |     |     |     | 1   | 3   |      |      |      |      | 1    |      |      |      |      | 1    | 3 |
| 1UVL |     |     |     |     |     |     |     |     | 1   | 3   |      |      |      |      | 1    |      |      |      |      | 1    | 3 |
| 2UVL |     |     |     |     |     |     |     |     |     |     |      |      |      |      |      |      |      |      |      |      |   |
| 3UVL |     | 1   |     |     | 2   |     |     |     |     |     |      |      |      |      |      |      | 1    | 1    |      |      |   |
| 4UVL | 2   | 3   | 2   | 2   | 3   | 2   | 2   |     |     |     |      |      |      |      |      |      | 3    | 3    |      |      |   |

One-way ANOVA with Tukey post-test

empty cell- not significant

1:  $P < 0.05$

2:  $P < 0.01$

3:  $P < 0.001$

C

Chl a/Chl b

|      | 0CL | 1CL | 2CL | 3CL | 4CL | 0CD | 1CD | 2CD | 3CD | 4CD | 0UVD | 1UVD | 2UVD | 3UVD | 4UVD | 0UVL | 1UVL | 2UVL | 3UVL | 4UVL |   |
|------|-----|-----|-----|-----|-----|-----|-----|-----|-----|-----|------|------|------|------|------|------|------|------|------|------|---|
| 0CL  |     |     |     |     |     |     |     |     |     |     |      |      |      |      |      |      |      |      |      |      |   |
| 1CL  |     |     |     |     |     |     |     |     |     |     |      |      |      |      |      |      |      |      |      |      | 1 |
| 2CL  |     |     |     |     |     |     |     |     |     |     |      |      |      |      |      |      |      |      |      |      | 1 |
| 3CL  |     |     |     |     |     |     |     |     |     |     |      |      |      |      | 1    |      |      |      |      | 2    | 3 |
| 4CL  |     |     |     |     |     |     |     |     |     |     |      |      |      |      |      |      |      |      |      | 1    | 2 |
| 0CD  |     |     |     |     |     |     |     |     |     |     |      |      |      |      |      |      |      |      |      |      |   |
| 1CD  |     |     |     |     |     |     |     |     |     |     |      |      |      |      |      |      |      |      |      |      | 1 |
| 2CD  |     |     |     |     |     |     |     |     |     |     |      |      |      |      |      |      |      |      |      |      | 1 |
| 3CD  |     |     |     |     |     |     |     |     |     |     |      |      |      |      | 1    |      |      |      |      | 2    | 3 |
| 4CD  |     |     |     |     |     |     |     |     |     |     | 1    | 1    | 2    | 3    | 3    |      |      |      | 2    | 3    | 3 |
| 0UVD |     |     |     |     |     |     |     |     |     | 1   |      |      |      |      |      |      |      |      |      |      |   |
| 1UVD |     |     |     |     |     |     |     |     |     | 1   |      |      |      |      |      |      |      |      |      |      |   |
| 2UVD |     |     |     |     |     |     |     |     |     | 2   |      |      |      |      |      |      |      |      |      |      |   |
| 3UVD |     |     |     |     |     |     |     |     | 1   | 3   |      |      |      |      |      |      |      |      |      |      |   |
| 4UVD |     |     |     | 1   |     |     |     |     |     | 3   |      |      |      |      |      |      |      |      |      |      |   |
| 0UVL |     |     |     |     |     |     |     |     |     |     |      |      |      |      |      |      |      |      |      |      | 1 |
| 1UVL |     |     |     |     |     |     |     |     |     |     |      |      |      |      |      |      |      |      |      |      | 1 |
| 2UVL |     |     |     |     |     |     |     |     |     | 2   |      |      |      |      |      |      |      |      |      |      |   |
| 3UVL |     |     |     | 2   | 1   |     |     |     | 2   | 3   |      |      |      |      |      |      |      |      |      |      |   |
| 4UVL |     | 1   | 1   | 3   | 2   |     | 1   | 1   | 3   | 3   |      |      |      |      |      | 1    | 1    |      |      |      |   |

One-way ANOVA with Tukey post-test

empty cell- not significant

1: P<0.05

2: P<0.01

3: P<0.001

d

## Violaxanthin

|      | 0CL | 1CL | 2CL | 3CL | 4CL | 0CD | 1CD | 2CD | 3CD | 4CD | 0UVD | 1UVD | 2UVD | 3UVD | 4UVD | 0UVL | 1UVL | 2UVL | 3UVL | 4UVL |   |
|------|-----|-----|-----|-----|-----|-----|-----|-----|-----|-----|------|------|------|------|------|------|------|------|------|------|---|
| 0CL  |     |     |     |     |     |     |     |     |     |     |      |      |      |      |      |      |      |      |      |      |   |
| 1CL  |     |     |     |     |     |     |     |     |     | 1   |      |      |      |      | 1    |      |      |      |      |      |   |
| 2CL  |     |     |     |     |     |     |     |     |     | 2   |      |      |      |      | 1    |      |      |      |      |      | 1 |
| 3CL  |     |     |     |     |     |     |     |     |     | 1   |      |      |      |      | 1    |      |      |      |      |      | 1 |
| 4CL  |     |     |     |     |     |     |     |     |     | 2   |      |      |      | 1    | 2    |      |      |      |      |      | 2 |
| 0CD  |     |     |     |     |     |     |     |     |     |     |      |      |      |      |      |      |      |      |      |      |   |
| 1CD  |     |     |     |     |     |     |     |     |     |     |      |      |      |      |      |      |      |      |      |      |   |
| 2CD  |     |     |     |     |     |     |     |     |     |     |      |      |      |      |      |      |      |      |      |      |   |
| 3CD  |     |     |     |     |     |     |     |     |     |     |      |      |      |      |      |      |      |      |      |      |   |
| 4CD  |     | 1   | 2   | 1   | 2   |     |     |     |     |     |      |      |      |      |      |      |      |      |      |      |   |
| 0UVD |     |     |     |     |     |     |     |     |     |     |      |      |      |      |      |      |      |      |      |      |   |
| 1UVD |     |     |     |     |     |     |     |     |     |     |      |      |      |      |      |      |      |      |      |      |   |
| 2UVD |     |     |     |     |     |     |     |     |     |     |      |      |      |      |      |      |      |      |      |      |   |
| 3UVD |     |     |     |     |     |     |     |     |     |     |      |      |      |      |      |      |      |      |      |      |   |
| 4UVD |     | 1   | 1   | 1   | 2   |     |     |     |     |     |      |      |      |      |      |      |      |      |      |      |   |
| 0UVL |     |     |     |     |     |     |     |     |     |     |      |      |      |      |      |      |      |      |      |      |   |
| 1UVL |     |     |     |     |     |     |     |     |     |     |      |      |      |      |      |      |      |      |      |      |   |
| 2UVL |     |     |     |     |     |     |     |     |     |     |      |      |      |      |      |      |      |      |      |      |   |
| 3UVL |     |     |     |     |     |     |     |     |     |     |      |      |      |      |      |      |      |      |      |      |   |
| 4UVL |     |     | 1   | 1   | 2   |     |     |     |     |     |      |      |      |      |      |      |      |      |      |      |   |

One-way ANOVA with Tukey post-test

empty cell- not significant

1:  $P < 0.05$

2:  $P < 0.01$

3:  $P < 0.001$

e

## Neoxanthin

|      | 0CL | 1CL | 2CL | 3CL | 4CL | 0CD | 1CD | 2CD | 3CD | 4CD | 0UVD | 1UVD | 2UVD | 3UVD | 4UVD | 0UVL | 1UVL | 2UVL | 3UVL | 4UVL |   |
|------|-----|-----|-----|-----|-----|-----|-----|-----|-----|-----|------|------|------|------|------|------|------|------|------|------|---|
| 0CL  |     |     |     |     |     |     |     |     |     |     |      |      |      |      |      | 2    |      |      |      |      |   |
| 1CL  |     |     |     |     |     |     |     |     |     |     |      |      |      |      |      | 2    |      |      |      | 1    | 1 |
| 2CL  |     |     |     |     |     |     |     |     |     |     |      |      |      |      |      |      |      |      |      |      | 3 |
| 3CL  |     |     |     |     |     |     |     |     |     |     |      |      |      |      |      |      |      |      |      |      | 2 |
| 4CL  |     |     |     |     |     |     |     |     |     |     |      |      |      |      |      |      |      |      |      |      | 2 |
| 0CD  |     |     |     |     |     |     |     |     |     |     |      |      |      |      |      |      |      |      |      |      | 2 |
| 1CD  |     |     |     |     |     |     |     |     |     |     |      |      |      |      |      |      |      |      |      |      | 1 |
| 2CD  |     |     |     |     |     |     |     |     |     |     |      |      |      |      |      |      |      |      |      |      | 1 |
| 3CD  |     |     |     |     |     |     |     |     |     |     |      |      |      |      |      |      |      |      |      |      |   |
| 4CD  |     |     |     |     |     |     |     |     |     |     |      |      |      |      |      |      |      | 1    |      |      |   |
| 0UVD |     |     |     |     |     |     |     |     |     |     |      |      |      |      |      |      |      |      |      |      |   |
| 1UVD |     |     |     |     |     |     |     |     |     |     |      |      |      |      |      |      |      |      |      |      |   |
| 2UVD |     |     |     |     |     |     |     |     |     |     |      |      |      |      |      |      |      |      |      |      |   |
| 3UVD |     |     |     |     |     |     |     |     |     |     |      |      |      |      |      |      |      |      |      |      |   |
| 4UVD |     | 2   | 2   |     |     |     |     |     |     |     |      |      |      |      |      |      |      |      |      |      |   |
| 0UVL |     |     |     |     |     |     |     |     |     |     |      |      |      |      |      |      |      |      |      |      | 1 |
| 1UVL |     |     |     |     |     |     |     |     |     | 1   |      |      |      |      | 2    |      |      |      |      | 1    | 3 |
| 2UVL |     |     |     |     |     |     |     |     |     |     |      |      |      |      |      |      |      |      |      |      |   |
| 3UVL |     |     | 1   |     |     |     |     |     |     |     |      |      |      |      |      |      |      |      | 1    |      |   |
| 4UVL |     |     | 1   | 3   | 2   | 2   |     |     |     |     |      |      |      |      |      |      | 1    | 3    |      |      |   |

One-way ANOVA with Tukey post-test

empty cell- not significant

1:  $P < 0.05$ 2:  $P < 0.01$ 3:  $P < 0.001$

f

Lutein

|      | 0CL | 1CL | 2CL | 3CL | 4CL | 0CD | 1CD | 2CD | 3CD | 4CD | 0UVD | 1UVD | 2UVD | 3UVD | 4UVD | 0UVL | 1UVL | 2UVL | 3UVL | 4UVL |   |
|------|-----|-----|-----|-----|-----|-----|-----|-----|-----|-----|------|------|------|------|------|------|------|------|------|------|---|
| 0CL  |     |     |     |     |     |     |     |     |     | 1   |      |      |      |      |      |      |      |      |      |      |   |
| 1CL  |     |     |     |     |     |     |     |     | 1   | 3   |      |      |      |      | 1    |      |      |      |      |      | 2 |
| 2CL  |     |     |     |     |     |     |     |     |     | 2   |      |      |      |      |      |      |      |      |      |      | 2 |
| 3CL  |     |     |     |     |     |     |     |     |     | 2   |      |      |      |      |      |      |      |      |      |      | 1 |
| 4CL  |     |     |     |     |     |     |     |     |     | 3   |      |      |      |      |      |      |      |      |      |      | 2 |
| 0CD  |     |     |     |     |     |     |     |     |     |     |      |      |      |      |      |      |      |      |      |      |   |
| 1CD  |     |     |     |     |     |     |     |     |     |     |      |      |      |      |      |      |      |      |      |      |   |
| 2CD  |     |     |     |     |     |     |     |     |     |     |      |      |      |      |      |      |      |      |      |      |   |
| 3CD  |     |     | 1   |     |     |     |     |     |     |     |      |      |      |      |      |      | 1    |      |      |      |   |
| 4CD  | 1   | 3   | 2   | 2   | 3   |     |     |     |     |     |      |      |      |      |      |      | 3    |      |      |      | 3 |
| 0UVD |     |     |     |     |     |     |     |     |     |     |      |      |      |      |      |      |      |      |      |      |   |
| 1UVD |     |     |     |     |     |     |     |     |     |     |      |      |      |      |      |      |      |      |      |      |   |
| 2UVD |     |     |     |     |     |     |     |     |     |     |      |      |      |      |      |      |      |      |      |      |   |
| 3UVD |     |     |     |     |     |     |     |     |     |     |      |      |      |      |      |      |      |      |      |      |   |
| 4UVD |     |     | 1   |     |     |     |     |     |     |     |      |      |      |      |      |      | 1    |      |      |      | 2 |
| 0UVL |     |     |     |     |     |     |     |     |     | 1   | 3    |      |      |      |      | 1    |      |      |      |      | 2 |
| 1UVL |     |     |     |     |     |     |     |     |     |     |      |      |      |      |      |      |      |      |      |      | 3 |
| 2UVL |     |     |     |     |     |     |     |     |     |     |      |      |      |      |      |      |      |      |      |      | 1 |
| 3UVL |     |     |     |     |     |     |     |     |     |     |      |      |      |      |      |      |      |      |      |      |   |
| 4UVL |     | 2   | 2   | 1   | 2   |     |     |     |     |     | 3    |      |      |      |      | 2    | 2    | 3    | 1    |      |   |

One-way ANOVA with Tukey post-test

empty cell- not significant

1:  $P < 0.05$

2:  $P < 0.01$

3:  $P < 0.001$

|      | 0CL | 1CL | 2CL | 3CL | 4CL | 0CD | 1CD | 2CD | 3CD | 4CD | 0UVD | 1UVD | 2UVD | 3UVD | 4UVD | 0UVL | 1UVL | 2UVL | 3UVL | 4UVL |   |
|------|-----|-----|-----|-----|-----|-----|-----|-----|-----|-----|------|------|------|------|------|------|------|------|------|------|---|
| 0CL  |     |     |     |     |     |     |     |     |     |     |      |      |      |      |      |      |      |      |      |      |   |
| 1CL  |     |     |     |     |     |     |     |     | 2   | 2   |      |      |      |      | 1    |      |      |      |      |      | 2 |
| 2CL  |     |     |     |     |     |     |     |     |     | 2   |      |      |      |      |      |      |      |      |      |      | 1 |
| 3CL  |     |     |     |     |     |     |     |     |     | 2   |      |      |      |      |      |      |      |      |      |      |   |
| 4CL  |     |     |     |     |     |     |     |     | 1   | 3   |      |      | 1    | 2    | 3    |      |      | 1    | 2    | 3    |   |
| 0CD  |     |     |     |     |     |     |     |     |     |     |      |      |      |      |      |      |      |      |      |      |   |
| 1CD  |     |     |     |     |     |     |     |     |     |     |      |      |      |      |      |      |      |      |      |      |   |
| 2CD  |     |     |     |     |     |     |     |     |     |     |      |      |      |      |      |      |      |      |      |      |   |
| 3CD  |     |     | 2   |     |     | 1   |     |     |     |     |      |      |      |      |      | 1    | 1    |      |      |      |   |
| 4CD  |     |     | 2   | 2   | 2   | 3   |     |     |     |     |      |      |      |      |      | 2    | 2    |      |      |      |   |
| 0UVD |     |     |     |     |     |     |     |     |     |     |      |      |      |      |      |      |      |      |      |      |   |
| 1UVD |     |     |     |     |     |     |     |     |     |     |      |      |      |      |      |      |      |      |      |      |   |
| 2UVD |     |     |     |     |     | 1   |     |     |     |     |      |      |      |      |      |      |      |      |      |      |   |
| 3UVD |     |     |     |     |     | 2   |     |     |     |     |      |      |      |      |      |      |      |      |      |      |   |
| 4UVD |     |     | 1   |     |     | 3   |     |     |     |     |      |      |      |      |      |      |      |      |      |      |   |
| 0UVL |     |     |     |     |     |     |     |     |     |     | 1    | 2    |      |      |      |      |      |      |      |      |   |
| 1UVL |     |     |     |     |     |     |     |     |     |     | 1    | 2    |      |      |      |      |      |      |      |      | 1 |
| 2UVL |     |     |     |     |     | 1   |     |     |     |     |      |      |      |      |      |      |      |      |      |      |   |
| 3UVL |     |     |     |     |     | 2   |     |     |     |     |      |      |      |      |      |      |      |      |      |      |   |
| 4UVL |     |     | 2   | 1   |     | 3   |     |     |     |     |      |      |      |      |      |      |      |      | 1    |      |   |

One-way ANOVA with Tukey post-test

empty cell- not significant

1:  $P < 0.05$

2:  $P < 0.01$

3:  $P < 0.001$



h

QYmax

|      | 0CL | 1CL | 2CL | 3CL | 4CL | 0CD | 1CD | 2CD | 3CD | 4CD | 0UVD | 1UVD | 2UVD | 3UVD | 4UVD | 0UVL | 1UVL | 2UVL | 3UVL | 4UVL |   |
|------|-----|-----|-----|-----|-----|-----|-----|-----|-----|-----|------|------|------|------|------|------|------|------|------|------|---|
| 0CL  |     |     |     |     |     |     |     |     | 3   | 3   |      |      |      | 2    | 3    | 3    |      | 3    | 3    | 3    | 3 |
| 1CL  |     |     |     |     |     |     |     |     | 3   | 3   |      |      |      | 2    | 3    | 3    |      | 3    | 3    | 3    | 3 |
| 2CL  |     |     |     |     |     |     |     |     | 3   | 3   |      |      |      |      | 3    | 3    |      | 3    | 3    | 3    | 3 |
| 3CL  |     |     |     |     |     |     |     |     | 3   | 3   |      |      |      | 1    | 3    | 3    |      | 3    | 3    | 3    | 3 |
| 4CL  |     |     |     |     |     |     |     |     | 3   | 3   |      |      |      | 1    | 3    | 3    |      | 3    | 3    | 3    | 3 |
| 0CD  |     |     |     |     |     |     |     |     | 3   | 3   |      |      |      | 2    | 3    | 3    |      | 3    | 3    | 3    | 3 |
| 1CD  |     |     |     |     |     |     |     |     | 3   | 3   |      |      |      |      | 3    | 3    |      | 2    | 3    | 3    | 3 |
| 2CD  |     |     |     |     |     |     |     |     | 3   | 3   |      |      |      |      |      | 3    |      |      | 3    | 3    | 3 |
| 3CD  | 3   | 3   | 3   | 3   | 3   | 3   | 3   | 3   | 3   | 3   |      |      |      | 3    | 3    | 3    |      | 3    | 1    |      | 3 |
| 4CD  | 3   | 3   | 3   | 3   | 3   | 3   | 3   | 3   | 3   | 3   |      |      |      | 3    | 3    | 3    |      | 3    | 3    | 3    |   |
| 0UVD |     |     |     |     |     |     |     |     | 3   | 3   |      |      |      |      | 3    |      |      | 2    | 3    | 3    | 3 |
| 1UVD |     |     |     |     |     |     |     |     | 3   | 3   |      |      |      |      |      | 3    |      | 1    | 3    | 3    | 3 |
| 2UVD | 2   | 2   |     | 1   | 1   | 2   |     |     | 3   | 3   |      |      |      |      | 1    | 3    |      |      | 3    | 3    | 3 |
| 3UVD | 3   | 3   | 3   | 3   | 3   | 3   | 3   | 3   | 3   | 3   |      |      |      | 3    | 3    | 1    |      | 3    |      | 3    | 3 |
| 4UVD | 3   | 3   | 3   | 3   | 3   | 3   | 3   | 3   | 3   | 3   |      |      |      | 3    | 3    |      |      | 3    | 3    |      | 3 |
| 0UVL |     |     |     |     |     |     |     |     | 3   | 3   |      |      |      |      |      | 3    |      | 3    |      | 3    | 3 |
| 1UVL | 3   | 3   | 3   | 3   | 3   | 2   | 2   |     | 1   | 3   | 2    | 1    |      |      | 3    |      |      |      | 3    | 3    | 3 |
| 2UVL | 3   | 3   | 3   | 3   | 3   | 3   | 3   | 3   | 3   | 3   | 3    | 3    | 3    | 3    | 3    |      |      | 3    | 3    |      | 1 |
| 3UVL | 3   | 3   | 3   | 3   | 3   |     |     | 3   | 3   | 3   | 3    | 3    | 3    | 3    | 3    | 3    | 3    | 3    | 3    | 1    |   |
| 4UVL | 3   | 3   | 3   | 3   | 3   | 3   | 3   | 3   | 3   | 3   | 3    | 3    | 3    | 3    | 3    | 3    | 3    | 3    | 3    | 3    |   |

One-way ANOVA with Tukey post-test

empty cell- not significant

1: P&lt;0.05

2: P&lt;0.01

3: P&lt;0.001
